# Supplementary material
Source: publisher figshare collection journal article supplement (https://diabetesjournals.figshare.com/articles/dataset/_/24437953)
Supplement: Supplementary file 1 [file 1]

**Table S4.** Comparison between area under the ROC curve (AUC) comparing the five different prediabetes prediction models with and without three selected metabolites in 143 adolescents from the SOLAR (discovery) cohort and 56 young adults from the CHS (validation) cohort by fitting the models independently in each cohort. The three predictive metabolites (caprylic acid, allylphenol sulfate, and taurocholic acid) were identified using LASSO regression and a stability selection procedure in the SOLAR cohort, and prediction models with and without the identified metabolites were developed independently in the SOLAR and CHS cohorts. In the CHS cohort, only one participant developed elevated HbA1c, so prediction models were not fit for this outcome. The P-value between the models compares the differences between the AUC without the metabolites versus the AUC with the metabolites. GRF: general risk factors only (sex, age, BMI, and in CHS, and in CHS, Hispanic/Latino Ethnicity); SPF: specific risk factors including fasting glucose, two-hour glucose, total cholesterol, and triglycerides.

| Clinical Outcome at Follow up                                                    | Risk Factors             | SOLAR (discovery)       |                            |                        | CHS (validation)        |                            |                        |
|----------------------------------------------------------------------------------|--------------------------|-------------------------|----------------------------|------------------------|-------------------------|----------------------------|------------------------|
|                                                                                  |                          | AUC Without Metabolites | AUC With Three Metabolites | P-value Between Models | AUC Without Metabolites | AUC With Three Metabolites | P-value Between Models |
| <b>Prediabetes/ type 2 diabetes</b>                                              | GRF                      | 0.59                    | 0.81                       | $7.8 \times 10^{-5}$   | 0.68                    | 0.80                       | 0.079                  |
|                                                                                  | GRF + SRF                | 0.63                    | 0.84                       | $2.6 \times 10^{-5}$   | 0.74                    | 0.88                       | 0.032                  |
|                                                                                  | No clinical risk factors | -                       | 0.80                       | -                      | -                       | 0.78                       | -                      |
| <b>Impaired fasting glucose (fasting glucose <math>\geq 100</math> mg/dL)</b>    | GRF                      | 0.71                    | 0.72                       | 0.68                   | 0.90                    | 0.93                       | 0.25                   |
|                                                                                  | GRF + SRF                | 0.88                    | 0.89                       | 0.14                   | 0.97                    | 0.97                       | 0.87                   |
|                                                                                  | No clinical risk factors | -                       | 0.67                       | -                      | -                       | 0.75                       | -                      |
| <b>Impaired glucose tolerance (Two-hour glucose <math>\geq 140</math> mg/dL)</b> | GRF                      | 0.60                    | 0.78                       | 0.018                  | 0.70                    | 0.89                       | 0.036                  |
|                                                                                  | GRF + SRF                | 0.63                    | 0.80                       | 0.012                  | 0.80                    | 0.94                       | 0.083                  |
|                                                                                  | No clinical risk factors | -                       | 0.77                       | -                      | -                       | 0.81                       | -                      |
| <b>HbA1c <math>\geq 5.7\%</math></b>                                             | GRF                      | 0.67                    | 0.89                       | 0.021                  | -                       | -                          | -                      |
|                                                                                  | GRF + SRF                | 0.71                    | 0.89                       | 0.013                  | -                       | -                          | -                      |
|                                                                                  | No clinical risk factors | -                       | 0.85                       | -                      | -                       | -                          | -                      |
