# Supplementary material
Source: publisher figshare collection journal article supplement (https://diabetesjournals.figshare.com/articles/dataset/_/24437953)
Supplement: Supplementary file 4 [file 1]

**Table S3.** Annotated metabolites associated with prediabetes risk in 143 overweight and obese adolescents from the SOLAR (discovery) cohort and 56 young adults from the CHS (validation) cohort. Metabolites were identified in the SOLAR cohort using LASSO regression and were independently validated in the CHS cohort. Annotation confidence is defined using the criteria of Schymanski et al. 2014 (40), where level 1 represents the confirmed structure and level 2 represents the probable structure based on diagnostic evidence.

| <b>Metabolite<br/>Name</b> | <b>m/z</b> | <b>Metabolite Class</b>  | <b>Annotation<br/>Confidence</b> | <b>Direction of<br/>Association</b> |            |
|----------------------------|------------|--------------------------|----------------------------------|-------------------------------------|------------|
|                            |            |                          |                                  | <b>SOLAR</b>                        | <b>CHS</b> |
| Caprylic acid              | 125.0974   | Medium-chain fatty acid  | Level 1                          | +                                   | +          |
| Allylphenol<br>sulfate     | 214.0261   | Phenylsulfate/polyphenol | Level 2                          | -                                   | -          |
| Taurocholic acid           | 515.2873   | Bile acid                | Level 1                          | +                                   | -          |
